# Supplementary material for: High-Frequency Repetitive Magnetic Stimulation Activates Bactericidal Activity of Macrophages via Modulation of p62/Keap1/Nrf2 and p38 MAPK Pathways
Source: MDPI journal article supplement (doi:10.3390/antiox12091695), 2023-08-30
Supplement: s1 [file s1]

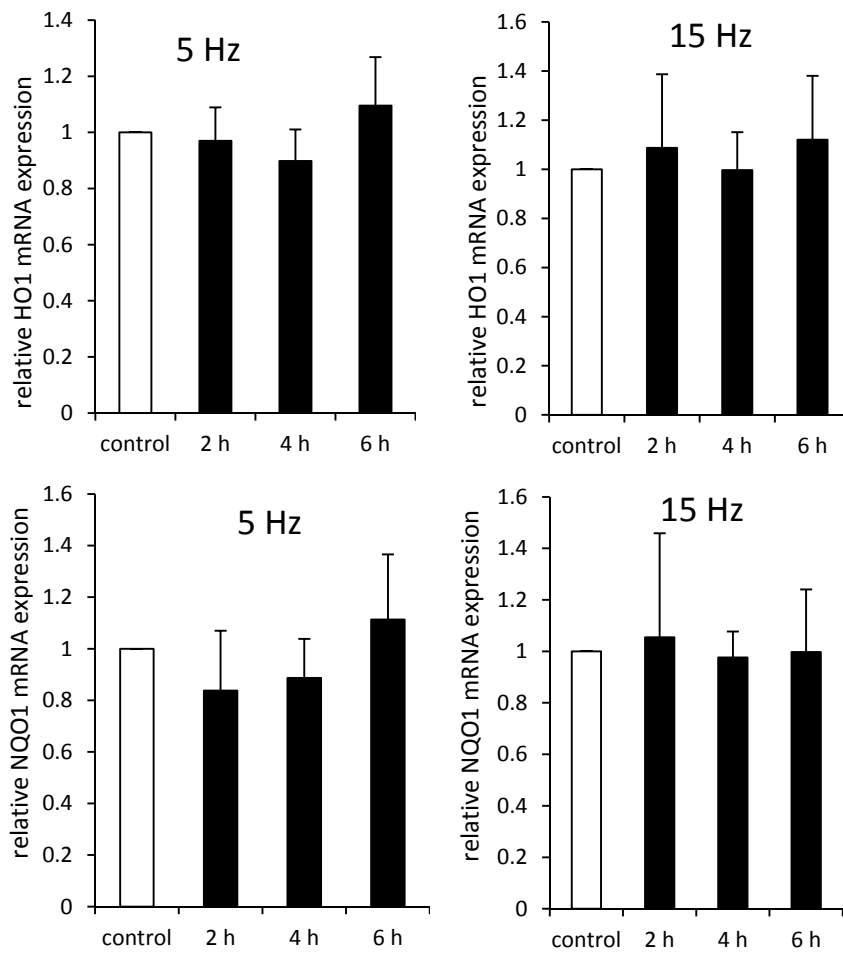

**Figure S1.** THP-1-derived macrophages were subjected to rMS protocol 5 Hz and 15 Hz and cells were lysed at the indicated time.
